# Supplementary material for: Extramacrochaetae functions in dorsal-ventral patterning ofDrosophilaimaginal discs
Source: Oxford University Press journal article supplement (doi:10.1242/dev.120618), 2015-02-27
Supplement: dev120618supp.pdf [file dev120618supp.pdf]

## Supplementary Materials and Methods

### PCR Conditions

1.0  $\mu$ l  $w^{1118}$  genomic DNA  
31.5  $\mu$ l  $dH_2O$   
10.0  $\mu$ l Phusion Buffer (5X)  
3.0  $\mu$ l Forward primer (0.2  $\mu$ M final concentration)  
3.0  $\mu$ l Reverse primer (0.2  $\mu$ M final concentration)  
1.0  $\mu$ l dNTPs (25 mM each)  
0.5  $\mu$ l Phusion DNA Polymerase

Step 1: 98°C 30 seconds  
Step 2: 98°C 10 seconds  
Step 3: 68°C 30 seconds  
Step 4: 72°C 30 seconds/kilobase  
Step 5: 72°C 10 minutes  
Steps 2 through 4 cycled 35 times

### Cloning Strategy

Fragment E1 was amplified from  $w^{1118}$  genomic DNA using primers (Listed in Table S1) that added a *Stu*I and *Xba*I restriction enzyme site to the 5' and 3' end of the fragment sequence, respectively. The amplified PCR product was digested with *Stu*I and *Xba*I restriction enzymes (NEB Catalog R0187S and R0145S), as was the expression vector *placZ-attB*. Both the digested fragment region PCR product and the digested *placZ-attB* vector were purified using the Thermo Scientific GeneJET PCR Purification Kit (Product K0701). The purified, digest *placZ-attB* vector was phosphatase-treated prior to ligation (NEB Catalog M0289S). The phosphatase enzyme was inactivated by high-temperature incubation but the reaction was not further purified. The digested Fragment E1 PCR product was ligated into the phosphatase-treated *placZ-attB* plasmid using T4 DNA Ligase (NEB Catalog M0202S). The ligation reaction was used to transform DH5 $\alpha$  Subcloning Efficiency Competent Cells (Life Technologies Catalog 18265-017). Cultures were started from the transformation colonies, mini-prepped, and the purified plasmids were sequenced to ensure proper ligation.

Fragments E2 and E3 were both amplified from  $w^{1118}$  genomic DNA using primers (Listed in Table S1) that added the Gateway recombination sequences to the 5' and 3' end of the fragment region. The amplified fragment PCR products were cloned into the pDONR201 vector using the Life Technologies Gateway BP Clonase Kit (Product 11789013). The recombined plasmids were used to transform DH5 $\alpha$  Subcloning Efficiency Competent Cells (Life Technologies Catalog 18265-017). Cultures were started from the transformation colonies, mini-prepped, and the purified plasmids were sequenced to ensure proper integration of the fragment. The two pDONR201-fragment plasmids were then used to move the enhancer region into the final destination vector *pglacZ-attB* using the Life Technologies Gateway LR Clonase Kit (Product 11791019). The recombined plasmids were used to transform DH5 $\alpha$  Subcloning Efficiency Competent Cells (Life Technologies Catalog 18265-017). Cultures were started from the transformation colonies, mini-prepped, and the purified plasmids were digested to ensure proper integration of the fragment.

**Fragment E1 Sequence**

CCCATCATGTGTGTGAAATACAATCGTGGATTTCTTGCCCAGAAACCCTGCAACTTCTTCGGTGCAATG  
GAGTGGGAGAGAAGTCGAGGCGCCTCGAACTCTTATGTGTGTTCAAGATGTCGTGGACTCAAATTAAG  
ATAAGATGCAGATAAGCCGTGCATTTTCGATTTAGCCGTTTGAAAACCTCGTTAATAAGAATTTGGTCAAT  
CCACTGATAACGACTAGTTTTCCATTGAACGGAGGCGCATAACGCTTATCTTTGTTAGGAATAAATATG  
ACAAATTGAACGACTACCGTTTAATCGTTTGTCTATATACGAAAACCTTAACAGGATTGTTTCGAGCTATCA  
GTTTATTTGAATAGTTATTGTTAATGAAAACCTACTACTAAGCCCAATATAATATATTATGAATATTTA  
CTCTTCTTATTTTCAAATGATTTAAAATTTTACCATTCCACAGCGATTAATAATCTAATTTACCCATGCAT  
ATATTTAATATTCATTCTGTAATTAATCAAGCCCTTGTTGAACCACTCGCATTGTCTTTTTCGCCTTTTCG  
TGTTGATTGTGGAACCTCCTTATCCCACAAAACACTTTTCATTCATTTTCATGCTCATTACAAAACATG  
AGAAAAAAAAAAGAAAAACAAACATTGCAGTCGTGAGAGGAAAATTATTGAGCGAGAGTTACTGTTTCGT  
GTTTTCTCATTTTCAGCTGAGAAAAGCAGCCGACCAATCACAAAACCAATTTCCCTTTACAAAAACCG  
ATCATTTTGCATCTCGTGGAGAGTATTCAGATTTGTTTGGAGAGTTTCGGAGAGGAACTCGTTAAGCCG  
GGTCTACAAAGGTGAGTATCTGTGGACCGTGGTGGAGTCAGGGGAAATGTTAGTGCTTTAAAAAGTGT  
CTACTATGTGTGGAATTTGGATTGTATCTTGTGGATTGGATATTGTGGTAAGGTTGAGTTTCATTTGGTA  
TCTCGGGTAGAAGTCAATGAGGTGGATGTTCCGGGCACACAGGCTGTAGAACTTGTTGGATATTTTGTG  
AAGAACTGAAAGTATCCGAAAGGATTAATTCATAGCATATATACCTCAGTTGTATTTTGAATTATTTTAAA  
TTAGTTTTCTCAGAATTCATGGGCTTCACACTACACATCTTCCCTCTTAAGATCTCAGGCTTAAATTCCG  
TACTCCATTCTCATTGTGGATTTGAAATGATGACTGTGAAGACCAACACGAAGGGCTACCCCTTAATT  
CCACATTCTTGTCCACCAAAGCAGACCTCTCCGCAACTCACCTCTTAGGAACTCTCCTAAATTCCGGTT  
TCAAGTTGTGGTCCAAGTTCCACATGGACACCAATGAGACACATTCCCAGTCTCCACTCTCCAACCA  
AGTACATATCTCTCTCCAGCCGAACGAACCCGAGAGCGAAGACTCCGCCTATCGGATTTCGGAAATGCC  
CGTTCGGGGGGTATAAAAGCGGGCGCTCTGAGCGAGCACCCTC

### Fragment E2 Sequence

GACTTCTATGTGGCTTCCATCGCAACTATTACTTAGCGCTCCTTTGATGAATATTTTTATGTATATTTTTTC  
TGCTTCACTAGAATGCTTGACTTATAGTTATTGGTCCCATGATCTGCATACCCCTAACGCAAATCAATC  
GGCCATTGCGAGTCTGAAATCCAGCTGAGCTCGGCAGTTATACCCATGCGTAAACAAAAAAAAGGC  
ATTTCTGTTTCAGTTCCATTCCACGCAATTGAGTTTATTGTTTTCGCCCCGAGAAAAGGGAAAGGGG  
GCGACTGGAGCGAGTAAGTAAACAAAAGCTCAGCGATCATCGACGCCTCAATGGAACTTTTTTTTGCTA  
CGAAATTAGTATTCAGTTACCATACGGACAACAACAAGTTAAACAAACCTGAAAAAAAACATGGACACA  
GGCCGGATGCGGCTAAAGCAAAAAAAGTCCAAGCCAAGAAGCCTCGACTGCAAGTGGGATCTCTGAT  
CTTGGATCACCAATTGCCAATCATCATCGCTGGCCATATGCAAATATGTTTATAAATAAACGACACTG  
AAAGAAGTGGATGTTTACCCAAGTTTCTGCTCAAGATTTAGTTTTAACCGAAATGGTGAAGTGGAGAGC  
CTTAAATTTGTGAATGAACTTTATAGTAGTTATAACATTTTGTATTACAGCACTTATCACATGGGCACCA  
CAAGATACCATTATATTTTCGCAATTGCCACGGGAAGTGTAGAAATTTTTATCGGTGCAGCGAAACGAAA  
TCGGTTCCGAATTCGAAGCGAAGTCATTAATGGGATGTCACTGGAGAGTGACAGGGCAGAGCACCC  
CTTTAATGGCAACTAGATGTCCTCAGCCCAGCTGAGATTGGAATGGAATCAGTTCCGGCTGGGACTGGG  
ATTTCAATGGGGATCGGATCGGATCGGATGGGATCGCATTGGAGATTGGGGCTCGAGGAGCGGGACT  
GAGTGACGGGTATTGGATTTCAACATGCAATGCACGCGGCGCGGCATGCGGCTGCATATCTGCAACG  
CCATCTCTGGGATACGTGGGATCCCCTTATCCCCTTATCCCCGATTTCCCTATCCCAATATATTATATAT  
ATATGAAATACAAAAAAAAGGCACCGCAAGTGCCCGCCCGCTGATTGACATGTGATCCTCATCTTC  
ATCGCATCCTCCACAAGTTTCTATGGCTTGCAAATAGCGGCCCTCTTGCCCTCAGATTTAAATACACTT  
TGAATATTAAGTTTATACTTGTGGTATATATTGAATTAATCGAAGATTCTCAGGAAGTGCATCTTAGAT  
ATAGGTAAACCAACTGCAATGCAAACGAACTACAATTTACCATCAGATGTAGGGTATTTAAATTGCGTA  
TTTATAGATTTTCTACATTTTTTCCAGTTTCTGCTGCTTTTAACTGTTGTTGGTTCTTCGGCGGCGC  
TGCTGATTTGTCAATCAGGCGAAACACTCGCGAGTCGTAAAGTAAGCTCCGTTTTAGTTCCAGTCTCCT  
GAAATCTGGCGAAGAAGACGTGAAATCATCTCGAGACGTGTTGTTGCAGCAGTCATAAAATTATGAT  
CGGTATTTTTTAGCCTTCCGTTCCCCTGGGAAATTTGAACTGTGTGCTGGTTTTTGGCAGCATTTTTTA  
GTTATTTTCGAGTCTAGTTTTTCGACATGGAACATGGATTTCTGCTGTATTTTCATGCAACACCTTGTCCC  
CGATTTCCAGGAACATATGTATGTATGATCTCGGGACATTCCTGAACTGCGTTTTCCACGGAAACTTGCA  
AATAGACCGTAGTAATTAAGGCACGAAAGCCGAAGAGCAATAAACACAAGCTTTTTCGAGCCCAGTCA  
TGTCTCCCATTCAGCCATAGCGAACCAATTCAAAACCATTTCTAACGCAGACGATAACCAGAGAGAGA  
CGTGTGTTTTTACAAACAACGACGCGCCCGCTCATTTTCAATGAAAATTTCCACAATTTCTCAATG  
GATCGTGTGACCCATCATGTGTGTGAAATACAATCGTGGATTTCTTGCCAGAAACCCTGCAACTTC  
TTCGGTGCAATGGAGTGGGAGAGAAGTCGAGGCGCCTCGAACTCTTATGTGTGTTCAAGATGTCGTG  
GACTCAAATTAAGATAAGATGCAGATAAGCCGTGCATTTTCGATTTAGCCGTTTAAAACTCGTTAATAA  
GAATTTGGTCAATCCACTGATAACGACTAGTTTTCCATTGAACGGAGGCGCATAACGCTTATCTTTGTT  
AGGAATAAATATGACAAATTGAACGACTACCGTTAATCGTTTTGTCTATATACGAAAACCTAACAGGATT  
GTTTCGAGCTATCAGTTTATTTGAATAGTTATTGTTAATGAAAACACTACTACTAAGCCCAATATAATATA  
TTATGAATATTTACTCTTCTTATTTTCAAATGATTTAAAATTTTACCATTCCACAGCGATTAAAATCTAAT  
TTACCCATGCATATATTTAATATTCTGTAATTAATCAAGCCCTTGTGTAACCACTCGCATTGTC

### Fragment E3 Sequence

CATTGTTAATCGTATCCTGCGTAATAGCATAATAATCCCTAATCGCATCTGATCAGTTCACCTGGTTGAA  
ACACTATCCCTTTCTCTCTCTCGCTCAATTCCCCGTCCCTGTCCCGCACACTATCGAAACGCCGGCTG  
CACGATTCCCATTTCGCATTACCACTTTGGCTTCCATCGATATGTCCTTTGTGCGCCTTTTGTCCGCGAG  
TGTCTTTTTACCCTAACTACGGGGCTGGGGTTATTTTGACAGCAGTTCATTTGCCTTCTGCCGCCGT  
TTCCTGCTGTTTCACTTTTGGCAAAAACACACAAAAAAATTTATGAAATTATGCCCAATCCAAATTTA  
CAAAATTC AACAAAAATACTTCTATGTGATATAAAAACTTATGAGCTCCATATATATTTCTTTTTGAACT  
GTAAGAATTGCTTCGATATAAATTAGGAATTTATTTTCAGTGCAGCTACTCAGCAGTTCGATTGGGGTTTA  
AGTTTGGTTTTCTCTTGAAGCCATGTTTTAGTTTGTATCCTCAATGAGTCGACTTCTATGTGGCTT  
CCATCGCAACTATTACTTAGCGCTCCTTTGATGAATATTTTATGTATATTTTCTGCTTCACTAGAATGC  
TTGACTTATAGTTATTGGTCCCATGATCTGCATACCCCTAACGCAAATCAATCGGCCCATTTGCGAGTCT  
GAAATCCAGCTGAGCTCGGCAGTTATACCCATGCGTAAACAAAAAAAGGCATTTCTGTTTCAGTTCC  
CATTCCCACGCAATTGAGTTTATTGTTTCGCCCGGAGAAAAGGGAAAGGGGGCGACTGGAGCGAGTA  
AGTAAACAAAAGCTCAGCGATCATCGACGCCTCAATGGAACTTTTTTTGCTACGAAATTAGTATTCAGT  
TACCATACGGACAACAACAAGTTAAACAAACCTGAAAAAAACATGGACACAGGCCGGATGCGGCTAA  
AGCAAAAAAAGTCCAAGCCAAGAAGCCTCGACTGCAAGTGGGATCTCTGATCTTGGATCACCAATTGC  
CAATCATCATCGCTGGCCATATGCAAATATGTTTATAAATAAACGACACTGAAAGAAGTGGATGTTTA  
CCCAAGTTTCTGCTCAAGATTTAGTTTTAACCGAAATGGTGAAGTGGAGAGCCTTAAATTTGTGAATGA  
ACTTTATAGTAGTTATAACATTTTGTATTACAGCACTTATCACATGGGCACCACAAGATACCATTATATT  
CGCAATTGCCACGGGAAGTGTAGAAATTTTTATCGGTGCAGCGAAACGAAATCGGTTCCGAATTCCAA  
GGCGAAGTCATTAATGGGATGTCACTGGAGAGTGACAGGGCAGAGCACCCCTTAAATGGCAACTAGA  
TGTCTCAGCCCAGCTGAGATTGGAATGGAATCAGTTCCGGCTGGGACTGGGATTTCAATGGGGATCG  
GATCGGATCGGATGGGATCGCATTGGAGATTGGGGCTCGAGGAGCGGGACTGAGTGACGGGTATTG  
GATTTCAACATGCAATGC

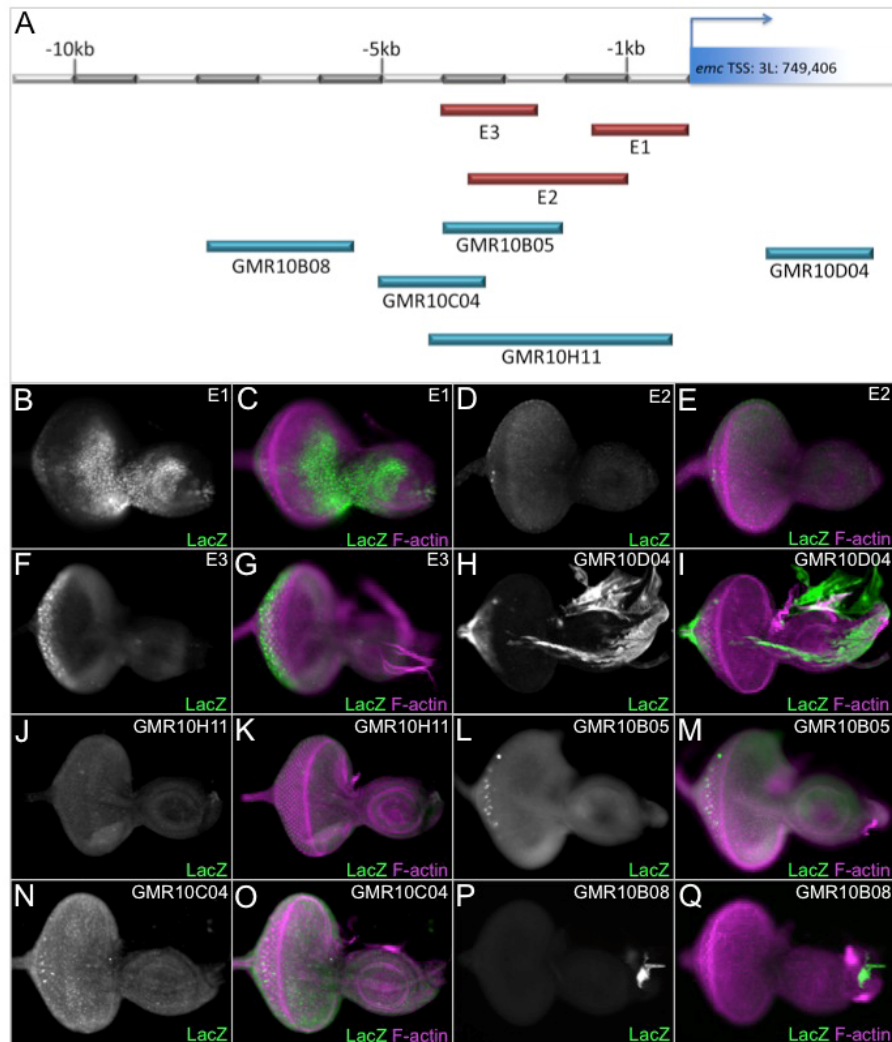

**Supplemental Figure 1. Preliminary search for enhancers driving midline expression.** (A) Depiction of the genomic region upstream the *emc* transcriptional start site located on 3L and the sub-genomic regions that were tested for the ability to drive expression at the midline. The genomic regions shown in aqua were isolated and fused to GAL4 by Gerald Rubin's laboratory at Janelia Farm. We cloned the regions in red and fused them directly to a lacZ reporter. (B-Q) Expression patterns driven by the eight genomic fragments in early third instar eye discs. None appear to direct reporter expression to the D/V midline. Dorsal side is up and anterior is to the right.

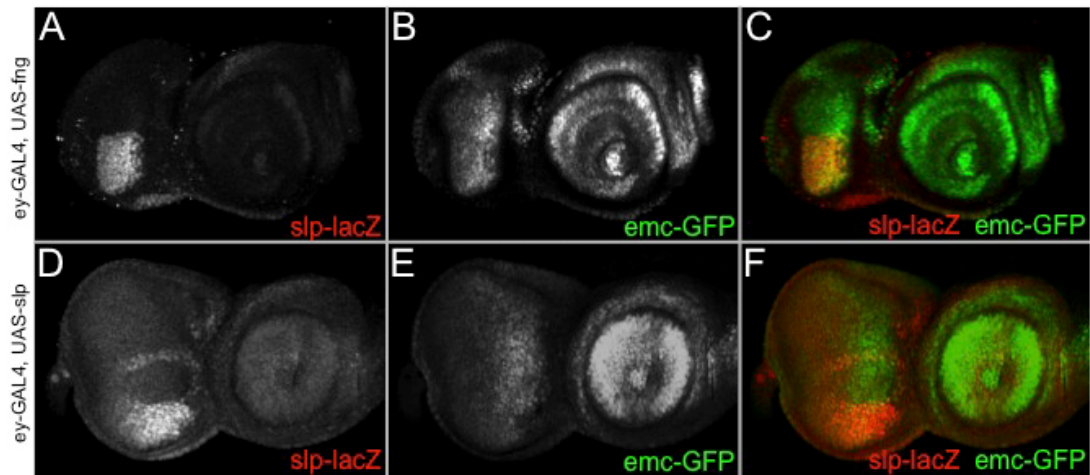

**Supplemental Figure 2. Expression of *fng* and *slp* throughout the eye with *ey-GAL4* eliminates enrichment of *emc* expression at the midline.** (A-C) Over-expression of *fng* throughout the entire disc using *ey-GAL4*. (D-F) Over-expression of *slp1* throughout the entire eye disc with *ey-GAL4*. In both experiments the enrichment of *emc* expression at the midline is abolished. Dorsal side is up and anterior is to the right.

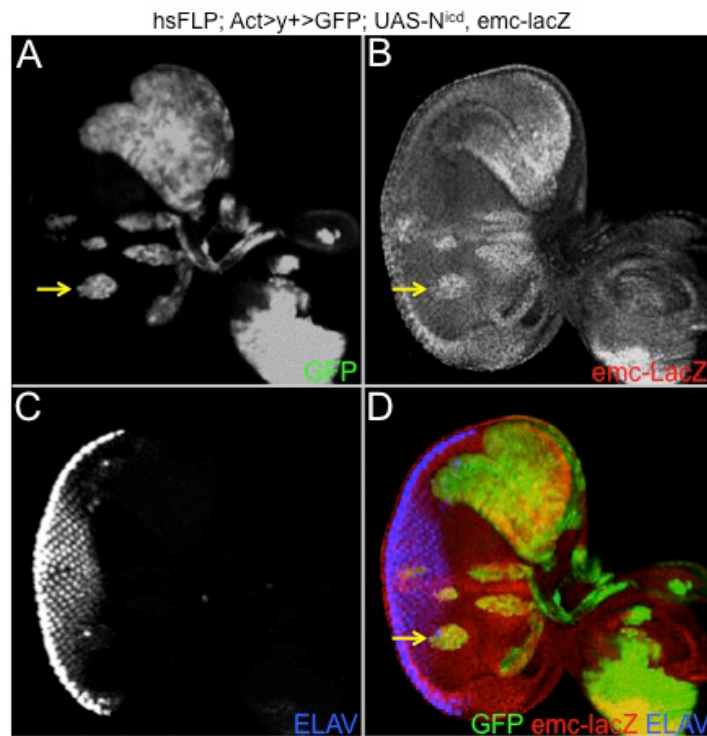

**Supplemental Figure 3.** Notch signaling can activate *emc* expression. (A-D) Over-expressing the intracellular domain of Notch (*hsFLP/ UAS-N<sup>icd</sup>; Act>y>GFP/+; emc-lacZ*) in flp-out clones (GFP positive cells in A) show a cell autonomous activation of *emc* expression. Yellow arrow highlights an example of a clone in which *emc-lacZ* is activated in response to higher N signaling. Dorsal side is up and anterior is to the right.

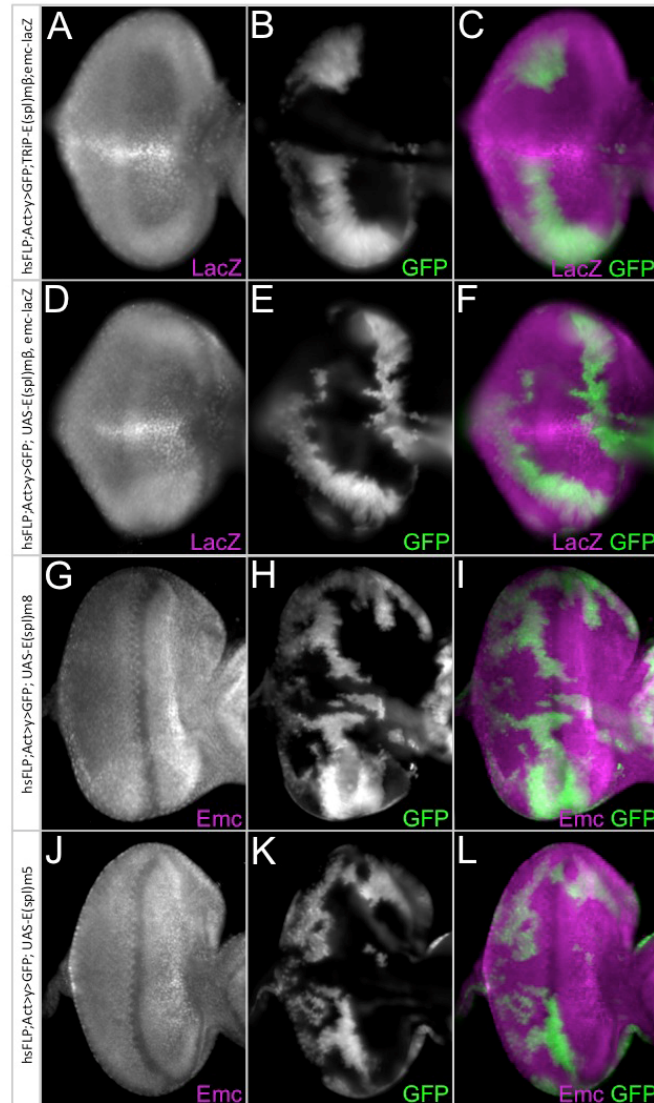

**Supplemental Figure 4. *emc* is regulated independently of the *E(spl)* complex.** (A-C) Expression of an RNAi line for *E(spl)mβ* (*hsFLP/+; Act>y>GFP/+; P{TRiP.JF02100}attP2/emc-lacZ*) in flp-out clones (GFP positive cells in B, C) does not alter *emc-lacZ* midline expression. (D-F) Over-expression of *E(spl)mβ* (*hsFLP/+; Act>y>GFP/+; UAS-E(spl)mβ/emc-lacZ*) in flp-out clones (GFP positive cells in E, F) does not alter *emc* levels. (G-I) Flp-out clones of *E(spl)m8* (*hsFLP/+; Act>y>GFP/+; UAS-E(spl)m8/+*: GFP positive cells in H, I) do not affect *Emc* protein levels in the eye disc. (J-L) Over-expressing *E(spl)m5* (*hsFLP/ UAS-E(spl)m5; Act>y>GFP/+*) in flp-out clones (GFP positive cells in K, L) do not show differences in levels of *Emc* protein. Dorsal side is up and anterior is to the right.



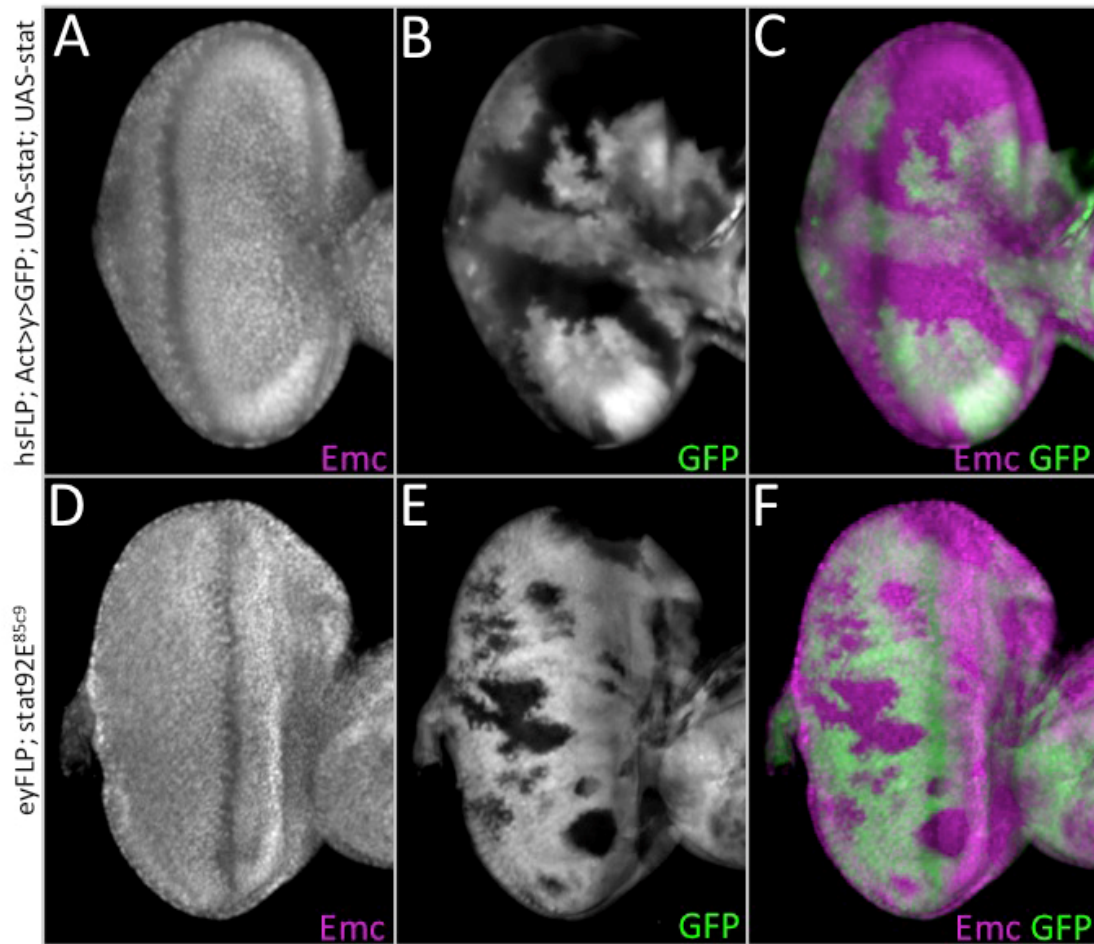

**Supplemental Figure 5. The JAK/STAT pathway does not regulate *emc* in the developing eye.** (A-C) Over-expression of *stat92E* in flp-out clones throughout the eye field (GFP positive cells in B, C) has no effect on Emc protein levels. (D-F) Mutant clones of *stat92E* (*eyFLP/+; stat92E<sup>85c9</sup>, FRT82B/Ubi-GFP, FRT82B*) induced throughout the eye (lack of GFP in E) also do not alter normal Emc protein levels. Dorsal side is up and anterior is to the right.

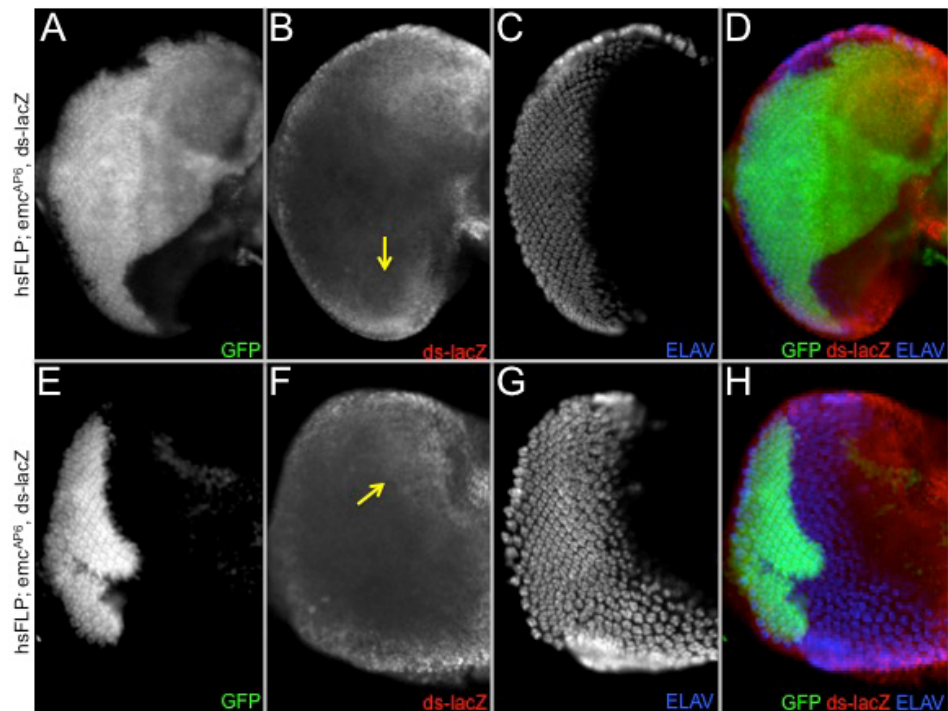

**Supplemental Figure 6. Dachshous expression is not regulated by Emc in the developing eye.** Two examples in which *ds-lacZ* expression is examined in *emc<sup>AP6</sup>* loss-of-function clones. (A-D) Ventral *emc<sup>AP6</sup>* clone, (E-H) Dorsal *emc<sup>AP6</sup>* clone. At both margins, *ds-lacZ* expression appears unaffected. Dorsal side up and anterior is to the right.

## **SUPPLEMENTARY TABLE**

### **Table S1**

[Click here to Download Table S1](#)
